# Supplementary material for: Myeloid zinc finger 1 mediates sulindac sulfide-induced upregulation of death receptor 5 of human colon cancer cells
Source: PubMed Central journal article supplement — Sci Rep. 2014 Aug 8;4:6000. doi: 10.1038/srep06000 (PMC4126006; doi:10.1038/srep06000), 2014-08-08
Supplement: srep06000-s1.pdf [file srep06000-s1.pdf]

**Title:** Myeloid zinc finger 1 mediates sulindac sulfide-induced upregulation of death receptor 5 of human colon cancer cells.

**Authors:** Mano Horinaka, Tatsushi Yoshida, Mitsuhiro Tomosugi, Shusuke Yasuda, Yoshihiro Sowa & Toshiyuki Sakai

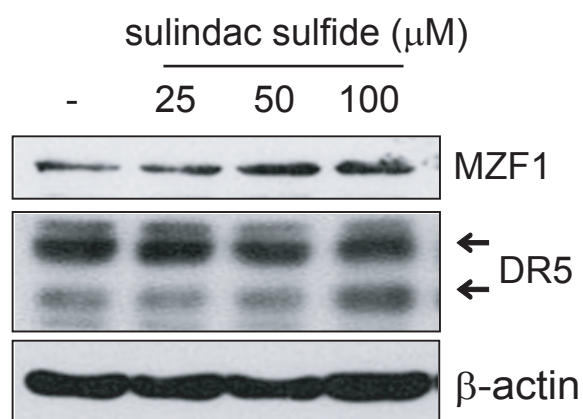

**Supplementary Figure Legends:** Western blotting for MZF1 and DR5. HCT116 cells were treated with the indicated concentrations of sulindac sulfide for 24 h.  $\beta$ -actin was used as a loading control.
